# Supplementary material for: Can discharge be used to inversely correct precipitation?
Source: Copernicus journal article supplement (doi:10.5194/hess-29-6115-2025), 2025-11-11
Supplement: Supplementary file 1 [file hess-29-6115-2025-supplement.pdf]

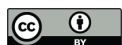

*Supplement of*

## **Can discharge be used to inversely correct precipitation?**

**Ashish Manoj J et al.**

*Correspondence to:* Ashish Manoj J (ashish.jaseetha@kit.edu)

The copyright of individual parts of the supplement might differ from the article licence.

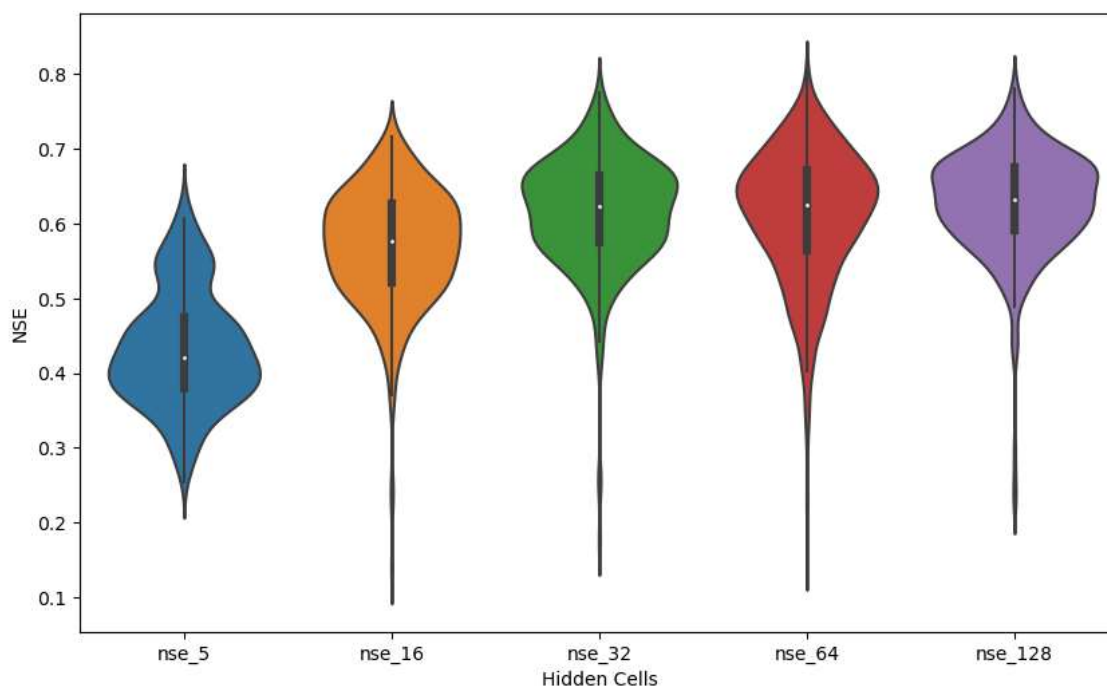

Figure S1 Sensitivity analysis for the LSTM model by changing the number of cells in the hidden layer.

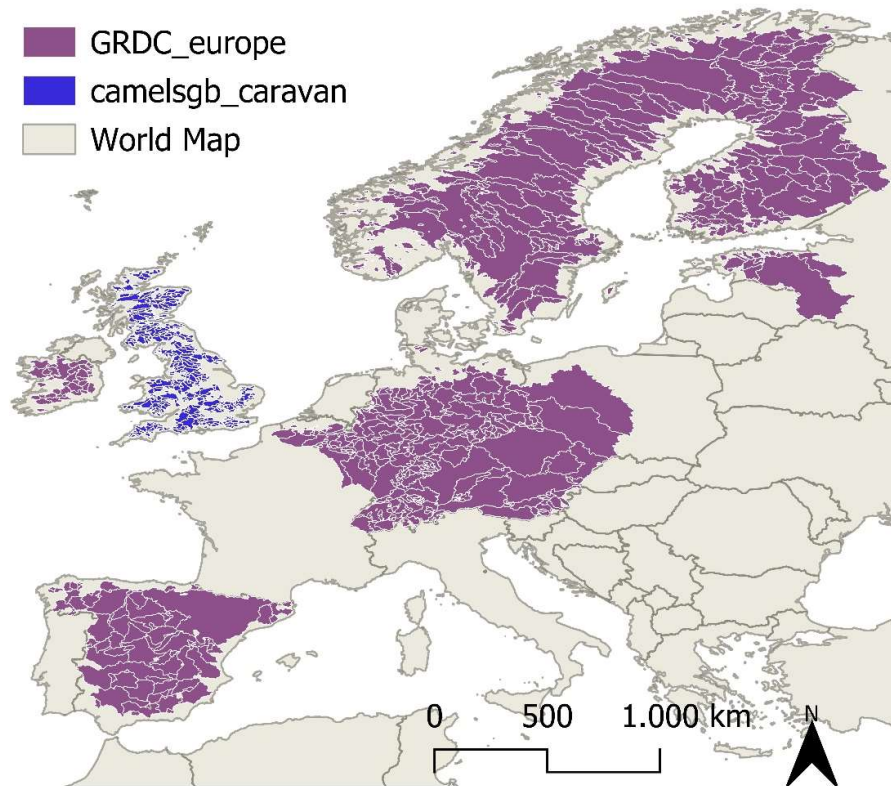

Figure S2 Study area map depicting the catchments from GRDC and CAMELS-GB used for training the LSTM Model.

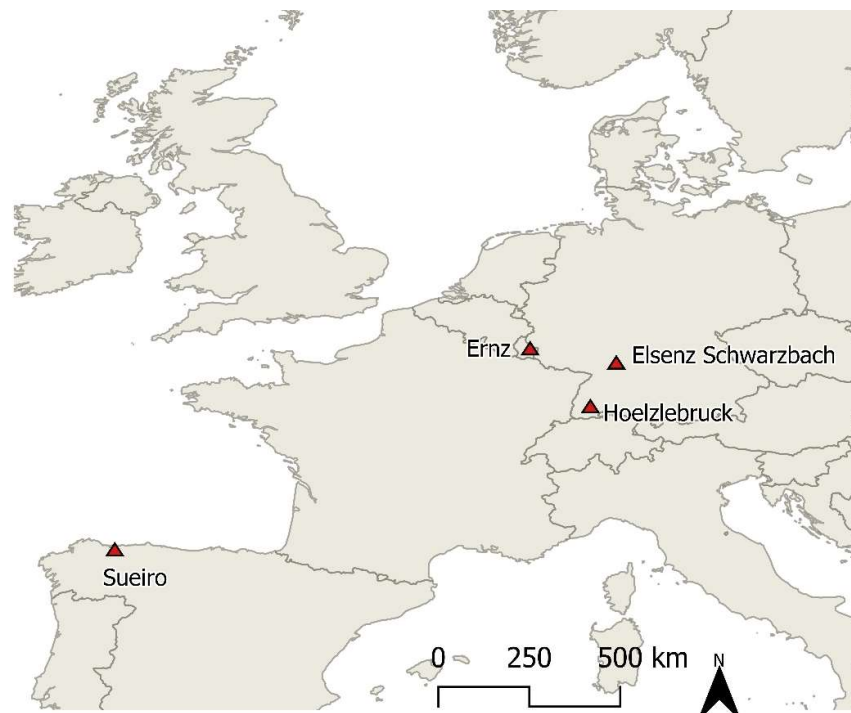

Figure S3 Study area map depicting the four catchments (red triangles) used for out of sample testing.

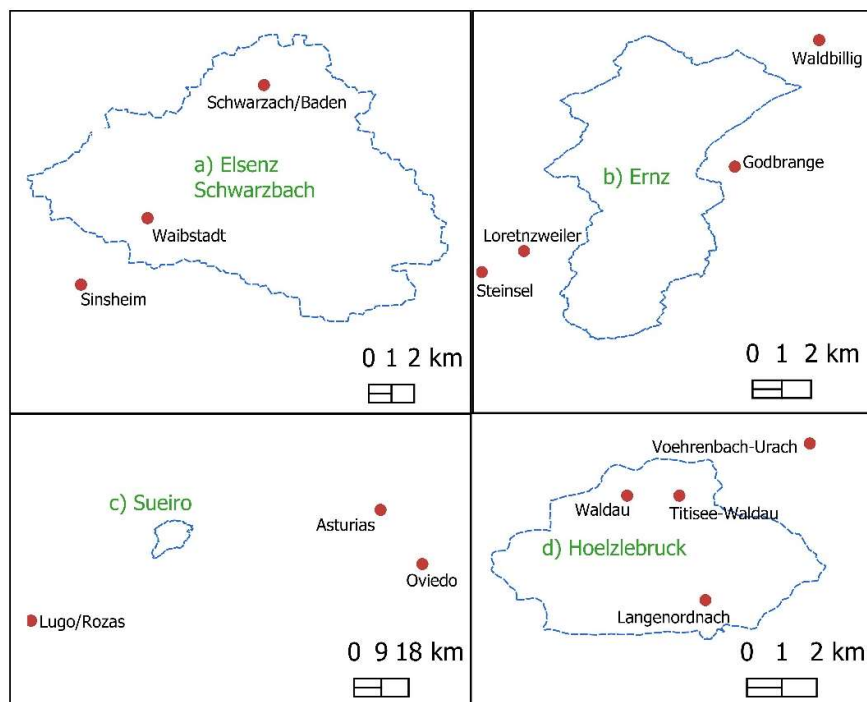

Figure S4 Spatial maps showing the proximity of (red circles) observational stations (used for deriving the EOBS gridded product) to the four out of sample catchments considered in the present study.

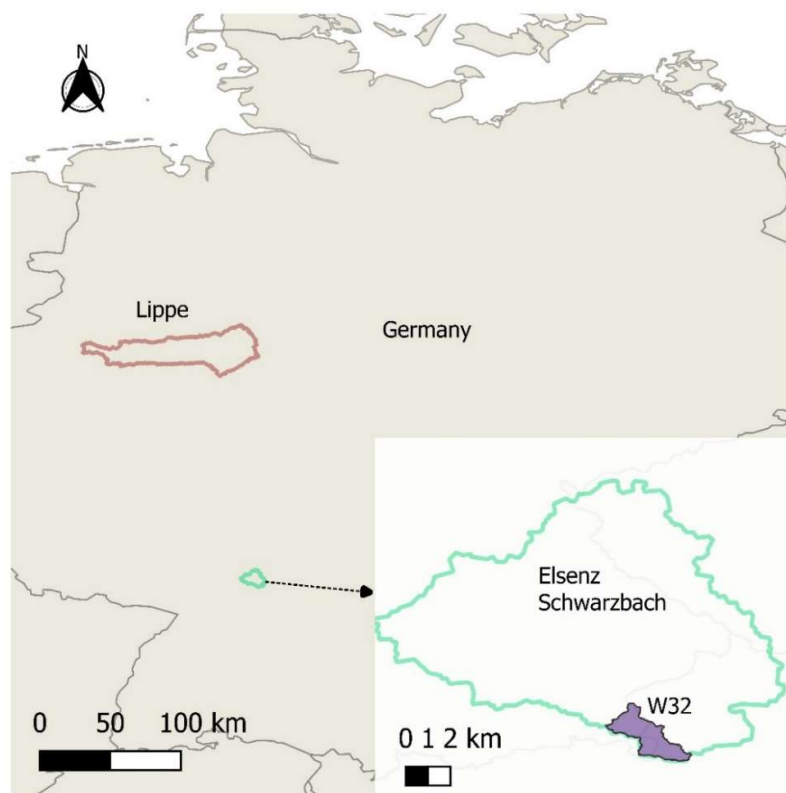

Figure S5 Catchments for the validation test cases using classical hydrological models
